# Supplementary material
Source: Springer Nature journal article supplement (https://www.springermedizin.de/resource/supplementary/12936_2007_512_MOESM4_ESM.pdf/9548150)

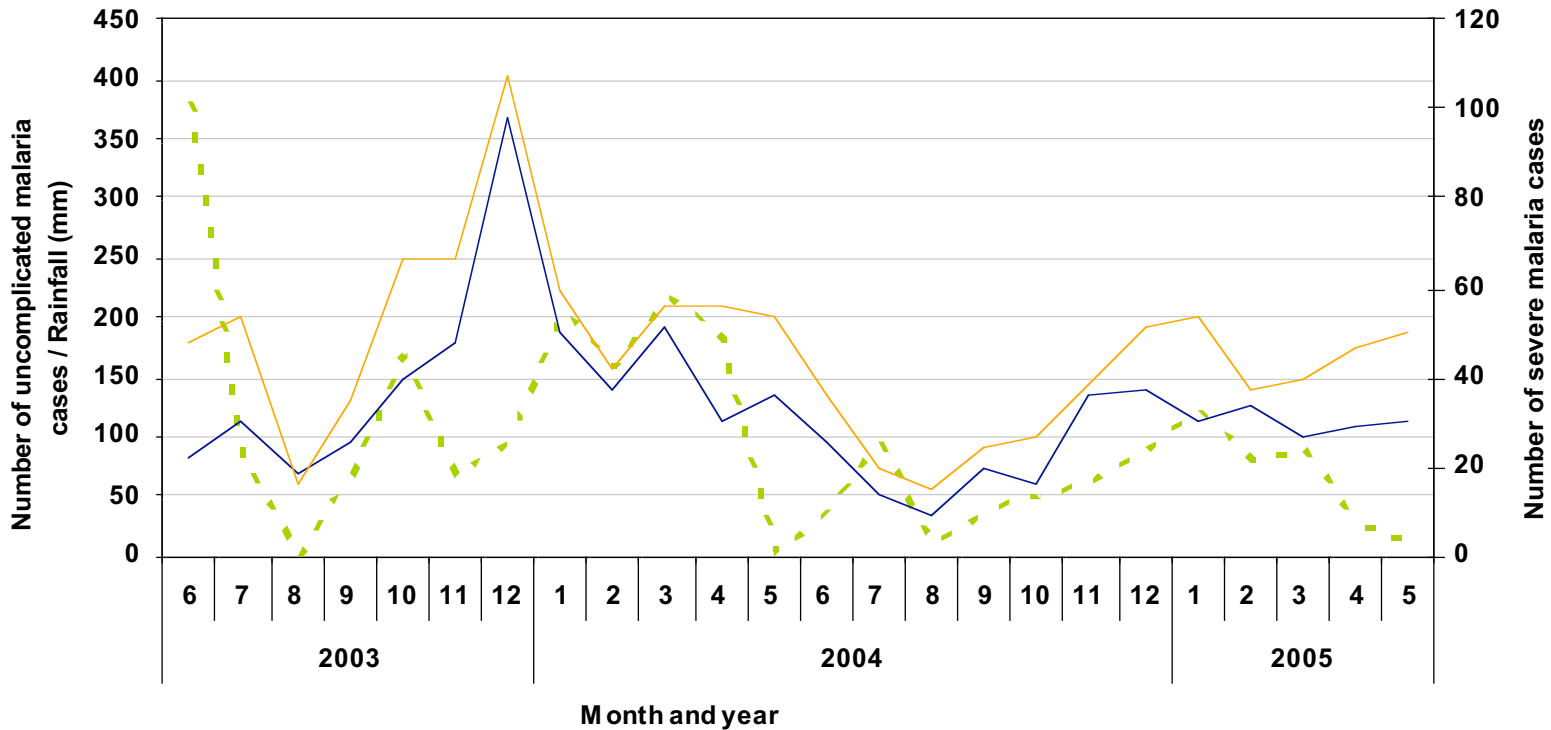

- - - Rainfall    
 — Uncomplicated malaria    
 — Severe malaria

Supplement: MOESM4 [file 9548150]
